# Supplementary material for: Halogen-regulating induced reversible high-temperature dielectric and thermal transitions in novel layered organic–inorganic hybrid semiconducting crystals
Source: Royal Society of Chemistry journal article supplement (doi:10.1039/d3dt01499a), 2023-01-01
Supplement: d3dt01499a1.pdf [file d3dt01499a1.pdf]

## Electronic Supplementary Information (ESI)

### Halogen Regulating Induced Reversible High-*T*-Dielectric-Thermal Transitions in Novel Layered Organic-Inorganic Hybrid Semiconducting Crystals

Ding-Chong Han, Yu-Hui Tan,\* Yun-Zhi Tang,\* Jia-Hui Wen, Hui-Juan Shi, Xiao-Wei Fan,\* Qiao-Lin Li and Meng-Na Wang

Faculty of Materials Metallurgy and Chemistry, Jiangxi University of Science and Technology, Ganzhou 341000, Jiangxi Province, P.R. China

Corresponding Author's E-mail: tyxcn@163.com (Y.-H. Tan); tangyunzhi75@163.com (Y.-Z. Tang)

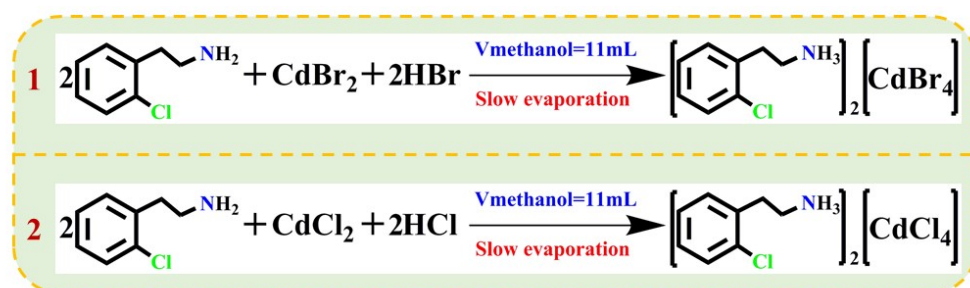

Fig. S1. The basic synthetic route of 1 and 2.

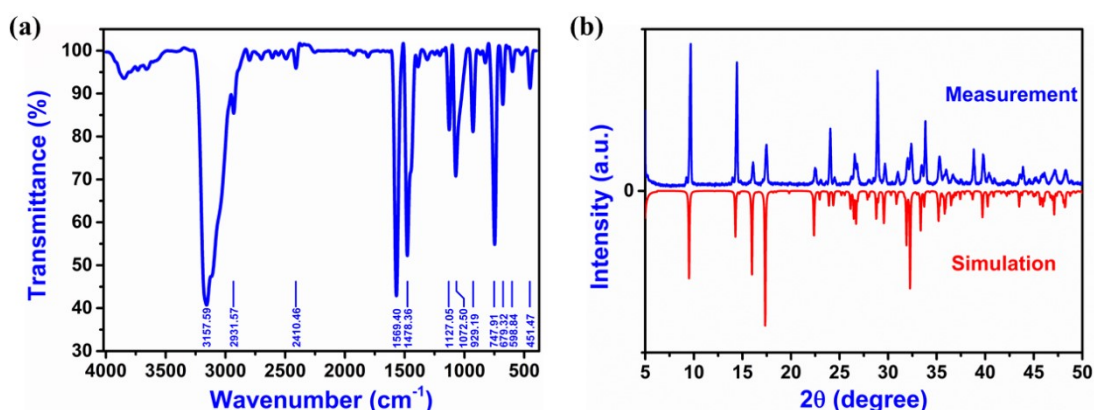

Fig. S2. PXRD (powder X-ray diffraction) measurement comparison with single crystal simulation (b) and the infrared (IR) spectra (a) of 1 at room temperature.

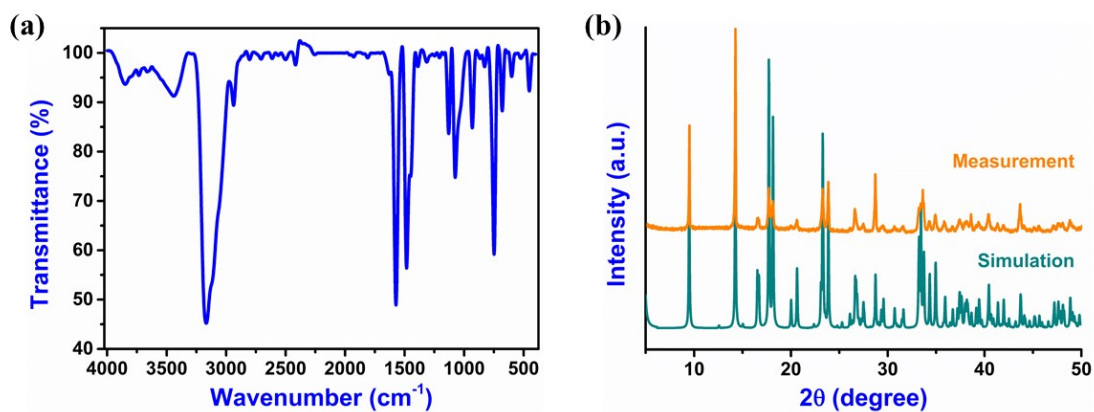

**Fig. S3.** PXRD (powder X-ray diffraction) measurement comparison with single crystal simulation (b) and the infrared (IR) spectra (a) of **2** at room temperature.

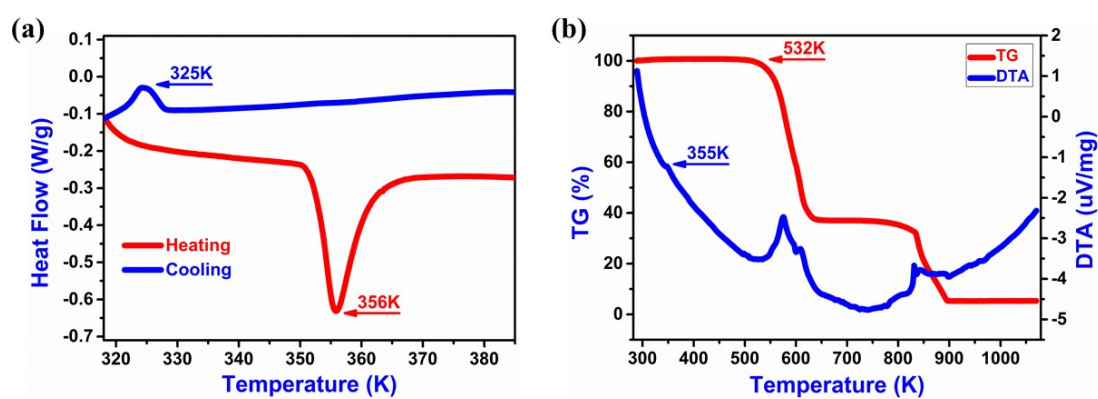

**Fig. S4.** The heat flow graph of **2** (a). TG-DTA curves ranging temperature from 290 K to 1075 K of **2** (b).

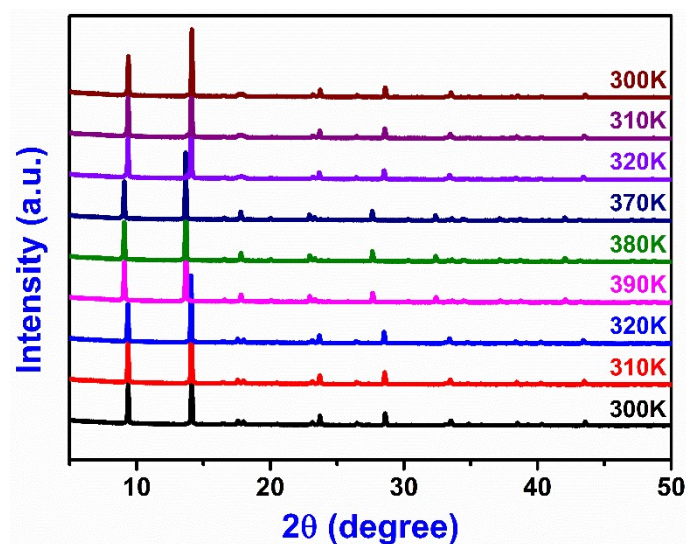

**Fig. S5.** The X-ray powder diffraction patterns of **2** at different temperatures.

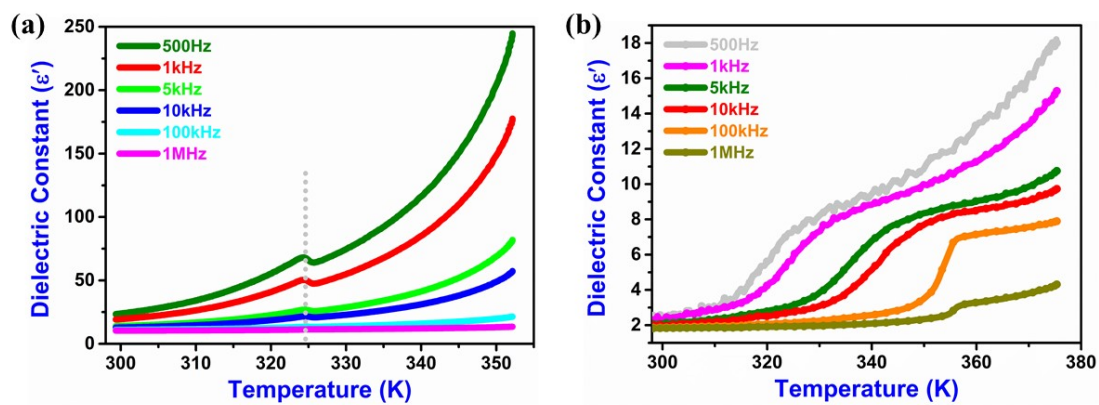

Fig. S6. The frequency-dependent  $\epsilon'$  curve of **1** (a) and **2** (b) with temperature changing.

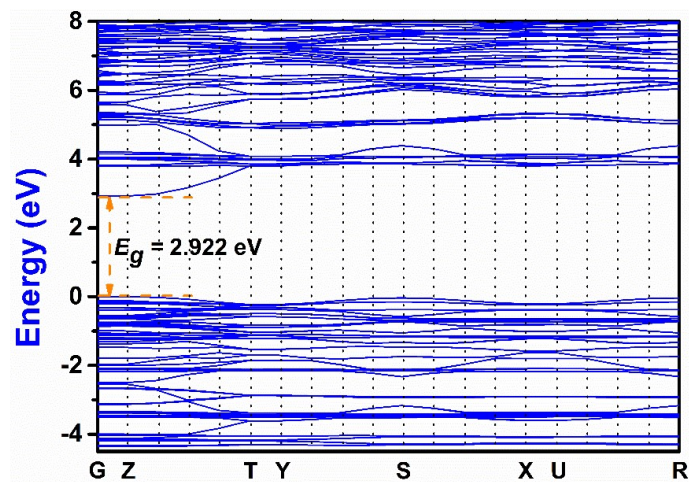

Fig. S7. The calculated energy band structures of **1**.

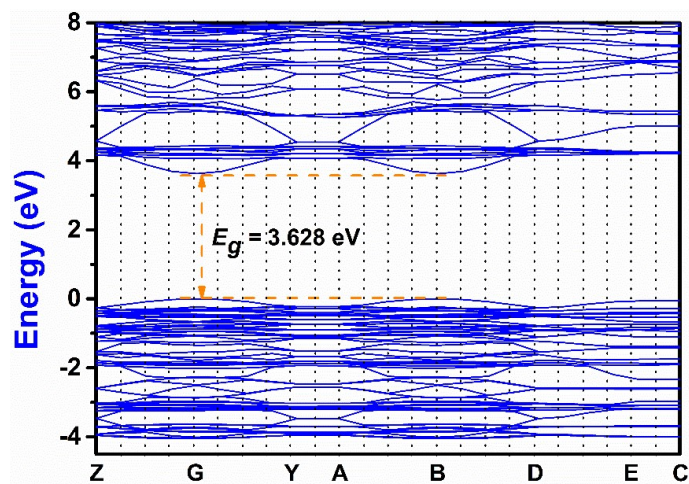

Fig. S8. The calculated energy band structures of **2**.

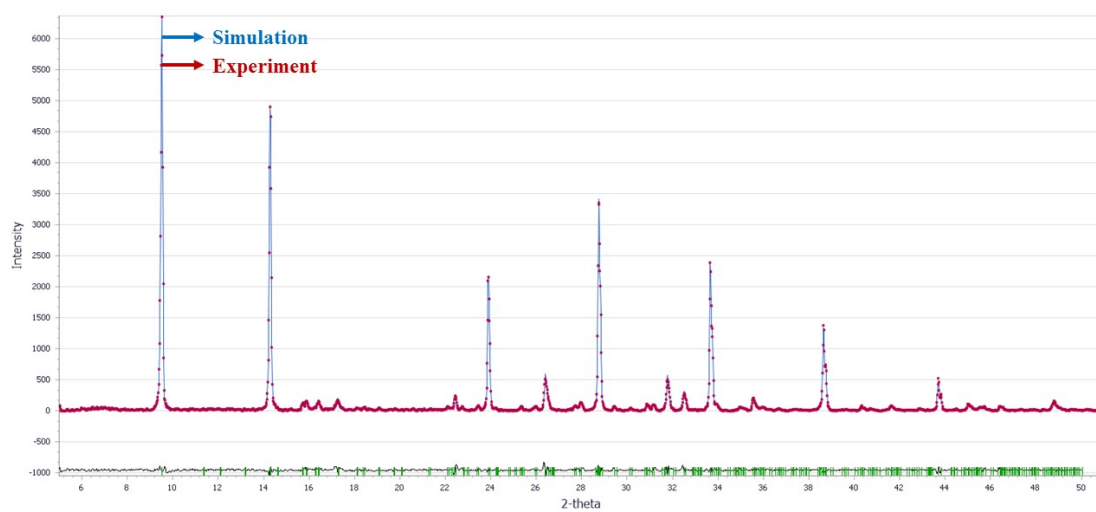

**Fig. S9.** The Pawley refinements results for **1** at 370 K. The refinements yielding tetragonal crystal system  $P4_2/n$  space group with cell parameters are  $a = b = 8.00325 \text{ \AA}$ ,  $c = 37.33742 \text{ \AA}$ ,  $\alpha = \beta = \gamma = 90^\circ$  and  $V = 2391.5368 \text{ \AA}^3$ .

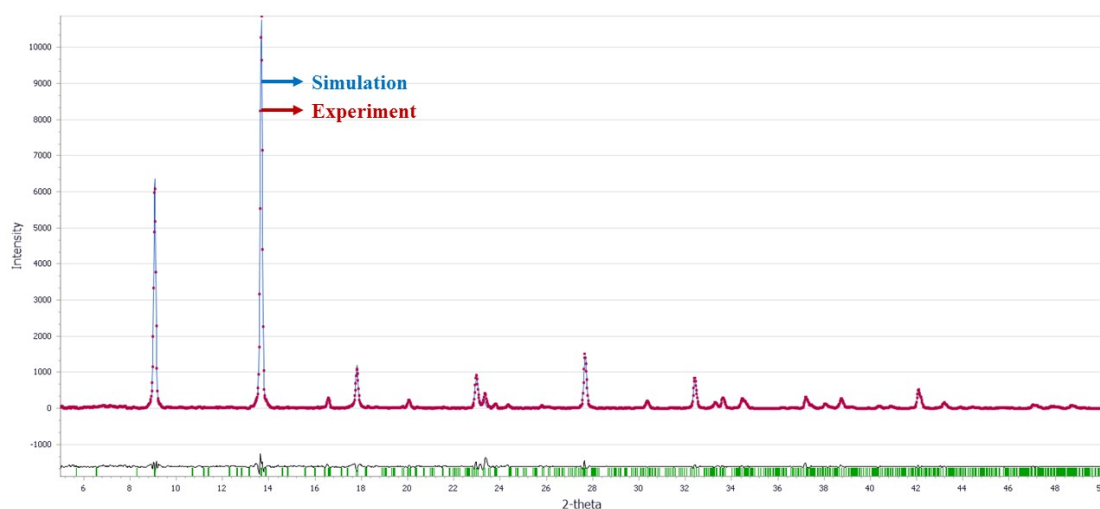

**Fig. S10.** The Pawley refinements results for **2** at 370 K. The refinements obtaining monoclinic crystal system  $I2/m$  space group with cell parameters are  $a = 19.68632 \text{ \AA}$ ,  $b = 9.75979 \text{ \AA}$ ,  $c = 13.50802 \text{ \AA}$ ,  $\alpha = \gamma = 90^\circ$ ,  $\beta = 127.97999^\circ$  and  $V = 2045.7253 \text{ \AA}^3$ .

**Table S1.** The crystallographic data and structure refinements at room temperature.

| Compound                                                                    | [Cl-C <sub>6</sub> H <sub>4</sub> -(CH <sub>2</sub> ) <sub>2</sub> NH <sub>3</sub> ] <sub>2</sub> CdBr <sub>4</sub> | [Cl-C <sub>6</sub> H <sub>4</sub> -(CH <sub>2</sub> ) <sub>2</sub> NH <sub>3</sub> ] <sub>2</sub> CdCl <sub>4</sub> |
|-----------------------------------------------------------------------------|---------------------------------------------------------------------------------------------------------------------|---------------------------------------------------------------------------------------------------------------------|
| Formula weight                                                              | 745.30                                                                                                              | 567.45                                                                                                              |
| Crystal system                                                              | Orthorhombic                                                                                                        | Monoclinic                                                                                                          |
| Space group                                                                 | <i>Pbcn</i>                                                                                                         | <i>P2<sub>1</sub>/c</i>                                                                                             |
| <i>a</i> (Å)                                                                | 7.917(3)                                                                                                            | 18.8581(14)                                                                                                         |
| <i>b</i> (Å)                                                                | 7.942(4)                                                                                                            | 7.6030(6)                                                                                                           |
| <i>c</i> (Å)                                                                | 37.185(13)                                                                                                          | 7.6418(6)                                                                                                           |
| $\alpha$ (°)                                                                | 90                                                                                                                  | 90                                                                                                                  |
| $\beta$ (°)                                                                 | 90                                                                                                                  | 99.102(2)                                                                                                           |
| $\gamma$ (°)                                                                | 90                                                                                                                  | 90                                                                                                                  |
| <i>V</i> (Å <sup>3</sup> )                                                  | 2338.1(17)                                                                                                          | 1081.87(14)                                                                                                         |
| <i>Z</i>                                                                    | 4                                                                                                                   | 2                                                                                                                   |
| Density (g/cm <sup>3</sup> )                                                | 2.117                                                                                                               | 1.742                                                                                                               |
| <i>m</i> (mm <sup>-1</sup> )                                                | 8.002                                                                                                               | 1.753                                                                                                               |
| F (000)                                                                     | 1416.0                                                                                                              | 564.0                                                                                                               |
| Data/restraints/parameters                                                  | 2691/0/115                                                                                                          | 2470/0/116                                                                                                          |
| GOF                                                                         | 1.257                                                                                                               | 1.153                                                                                                               |
| <i>R</i> <sub>1</sub> , <i>wR</i> <sub>2</sub> [ <i>I</i> ≥ 2σ( <i>I</i> )] | <i>R</i> <sub>1</sub> = 0.0790,<br><i>wR</i> <sub>2</sub> = 0.1972                                                  | <i>R</i> <sub>1</sub> = 0.0403,<br><i>wR</i> <sub>2</sub> = 0.1078                                                  |
| <i>R</i> <sub>1</sub> , <i>wR</i> <sub>2</sub> (all data)                   | <i>R</i> <sub>1</sub> = 0.0946,<br><i>wR</i> <sub>2</sub> = 0.2050                                                  | <i>R</i> <sub>1</sub> = 0.0447,<br><i>wR</i> <sub>2</sub> = 0.1125                                                  |
| $\Delta\rho_{max}/\Delta\rho_{min}$ (eÅ <sup>-3</sup> )                     | 1.09/-2.30                                                                                                          | 1.93/-0.59                                                                                                          |
| CCDC                                                                        | 2263024                                                                                                             | 2263054                                                                                                             |

**Table S2.** Intermolecular hydrogen bond lengths (Å) and angles (°) for **1**.

| D-H...A      | D-H  | H...A | D...A     | ∠D-H...A |
|--------------|------|-------|-----------|----------|
| N1-H1A...Br2 | 0.89 | 2.69  | 3.343(11) | 131      |
| N1-H1B...Br1 | 0.89 | 2.86  | 3.695(11) | 156      |
| N1-H1C...Br1 | 0.89 | 2.58  | 3.466(11) | 171      |

**Table S3.** Intermolecular hydrogen bond lengths (Å) and angles (°) for **2**.

| D-H...A      | D-H  | H...A | D...A    | ∠D-H...A |
|--------------|------|-------|----------|----------|
| N1-H1A...Cl2 | 0.89 | 2.50  | 3.196(4) | 135      |
| N1-H1B...Cl3 | 0.89 | 2.69  | 3.479(4) | 148      |
| N1-H1C...Cl3 | 0.89 | 2.45  | 3.332(4) | 169      |

## Calculation of $\Delta S$ and $N$

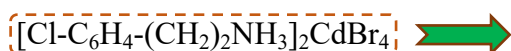

### In the heating cycle mode

$$\Delta S_1 = R \ln N_1$$

$$\Delta S_1 = \int_{T_2}^{T_1} \frac{Q}{T} dT$$

$$\approx \frac{\Delta H}{T_c}$$

$$= \frac{3.150 \text{ g}^{-1} \times 745.30 \text{ mol}^{-1} \text{ g}}{335 \text{ K}}$$

$$= 7.01 \text{ J} \cdot \text{mol}^{-1} \cdot \text{K}^{-1}$$

$$N_1 = \exp\left(\frac{\Delta S_1}{R}\right) = \exp\left(\frac{7.01 \text{ J} \cdot \text{mol}^{-1} \cdot \text{K}^{-1}}{8.314 \text{ J} \cdot \text{mol}^{-1} \cdot \text{K}^{-1}}\right)$$

$$= 2.32$$

### In the cooling cycle mode

$$\Delta S_2 = R \ln N_2$$

$$\Delta S_2 = \int_{T_2}^{T_1} \frac{Q}{T} dT$$

$$\approx \frac{\Delta H}{T_c}$$

$$= \frac{2.990 \text{ g}^{-1} \times 745.30 \text{ mol}^{-1} \text{ g}}{323 \text{ K}}$$

$$= 6.90 \text{ J} \cdot \text{mol}^{-1} \cdot \text{K}^{-1}$$

$$N_2 = \exp\left(\frac{\Delta S_2}{R}\right) = \exp\left(\frac{6.90 \text{ J} \cdot \text{mol}^{-1} \cdot \text{K}^{-1}}{8.314 \text{ J} \cdot \text{mol}^{-1} \cdot \text{K}^{-1}}\right)$$

$$= 2.29$$

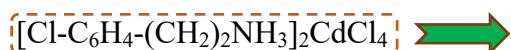

### In the heating cycle mode

$$\Delta S_1 = R \ln N_1$$

$$\Delta S_1 = \int_{T_2}^{T_1} \frac{Q}{T} dT$$

$$\approx \frac{\Delta H}{T_c}$$

$$= \frac{6.929 \text{ g}^{-1} \times 567.45 \text{ mol}^{-1} \text{ g}}{356 \text{ K}}$$

$$= 11.04 \text{ J} \cdot \text{mol}^{-1} \cdot \text{K}^{-1}$$

$$N_1 = \exp\left(\frac{\Delta S_1}{R}\right) = \exp\left(\frac{11.04 \text{ J} \cdot \text{mol}^{-1} \cdot \text{K}^{-1}}{8.314 \text{ J} \cdot \text{mol}^{-1} \cdot \text{K}^{-1}}\right)$$

$$= 3.77$$

### In the cooling cycle mode

$$\Delta S_2 = R \ln N_2$$

$$\Delta S_2 = \int_{T_2}^{T_1} \frac{Q}{T} dT$$

$$\approx \frac{\Delta H}{T_c}$$

$$= \frac{5.790 \text{ g}^{-1} \times 567.45 \text{ mol}^{-1} \text{ g}}{325 \text{ K}}$$

$$= 10.11 \text{ J} \cdot \text{mol}^{-1} \cdot \text{K}^{-1}$$

$$N_2 = \exp\left(\frac{\Delta S_2}{R}\right) = \exp\left(\frac{10.11 \text{ J} \cdot \text{mol}^{-1} \cdot \text{K}^{-1}}{8.314 \text{ J} \cdot \text{mol}^{-1} \cdot \text{K}^{-1}}\right)$$

$$= 3.37$$
